# Supplementary material
Source: ML conference proceedings conference paper supplement (https://proceedings.neurips.cc/paper_files/paper/2016/hash/98e6f17209029f4ae6dc9d88ec8eac2c-Abstract.html)
Supplement: Supplementary file [file 98e6f17209029f4ae6dc9d88ec8eac2c-Supplemental.zip]

## Appendix: Fast Stochastic Optimization on Riemannian Manifolds

### A Proofs for Section 3.1

**Theorem 1.** Assume in (1) each  $f_i$  is  $L$ -g-smooth, and  $f$  is  $\mu$ -strongly g-convex, then if we run Algorithm 1 with Option I and parameters that satisfy

$$\alpha = \frac{3\zeta\eta L^2}{\mu - 2\zeta\eta L^2} + \frac{(1 + 4\zeta\eta^2 - 2\eta\mu)^m(\mu - 5\zeta\eta L^2)}{\mu - 2\zeta\eta L^2} < 1$$

then with  $S$  outer loops, the Riemannian SVRG algorithm produces an iterate  $x_a$  that satisfies

$$\mathbb{E}d^2(x_a, x^*) \leq \alpha^S d^2(x^0, x^*).$$

*Proof.* We start by bounding the squared norm of the variance reduced gradient. Since  $v_t^{s+1} = \nabla f_{i_t}(x_t^{s+1}) - \Gamma_{\tilde{x}^s}^{x_t^{s+1}}(\nabla f_{i_t}(\tilde{x}^s) - g^{s+1})$ , conditioned on  $x_t^{s+1}$  and taking expectation with respect to  $i_t$ , we obtain:

$$\begin{aligned} \mathbb{E}\|v_t^{s+1}\|^2 &= \mathbb{E}\left\|\nabla f_{i_t}(x_t^{s+1}) - \Gamma_{\tilde{x}^s}^{x_t^{s+1}}(\nabla f_{i_t}(\tilde{x}^s) - g^{s+1})\right\|^2 \\ &= \mathbb{E}\left\|\left(\nabla f_{i_t}(x_t^{s+1}) - \Gamma_{\tilde{x}^s}^{x_t^{s+1}}\nabla f_{i_t}(\tilde{x}^s)\right) + \Gamma_{\tilde{x}^s}^{x_t^{s+1}}\left(\nabla f(\tilde{x}^s) - \Gamma_{x^*}^{\tilde{x}^s}\nabla f(x^*)\right)\right\|^2 \\ &\leq 2\mathbb{E}\left\|\nabla f_{i_t}(x_t^{s+1}) - \Gamma_{\tilde{x}^s}^{x_t^{s+1}}\nabla f_{i_t}(\tilde{x}^s)\right\|^2 + 2\mathbb{E}\left\|\Gamma_{\tilde{x}^s}^{x_t^{s+1}}\left(\nabla f(\tilde{x}^s) - \Gamma_{x^*}^{\tilde{x}^s}\nabla f(x^*)\right)\right\|^2 \\ &= 2\mathbb{E}\left\|\nabla f_{i_t}(x_t^{s+1}) - \Gamma_{\tilde{x}^s}^{x_t^{s+1}}\nabla f_{i_t}(\tilde{x}^s)\right\|^2 + 2\mathbb{E}\left\|\nabla f(\tilde{x}^s) - \Gamma_{x^*}^{\tilde{x}^s}\nabla f(x^*)\right\|^2 \\ &\leq 2L^2\left\|\text{Exp}_{x_t^{s+1}}^{-1}(\tilde{x}^s)\right\|^2 + 2L^2\left\|\text{Exp}_{\tilde{x}^s}^{-1}(x^*)\right\|^2 \\ &\leq 2L^2\left(\left\|\text{Exp}_{x_t^{s+1}}^{-1}(x^*)\right\| + \left\|\text{Exp}_{\tilde{x}^s}^{-1}(x^*)\right\|\right)^2 + 2L^2\left\|\text{Exp}_{\tilde{x}^s}^{-1}(x^*)\right\|^2 \\ &\leq 4L^2\left\|\text{Exp}_{x_t^{s+1}}^{-1}(x^*)\right\|^2 + 6L^2\left\|\text{Exp}_{\tilde{x}^s}^{-1}(x^*)\right\|^2 \end{aligned}$$

We use  $\|a + b\|^2 \leq 2\|a\|^2 + 2\|b\|^2$  twice, in the first and fourth inequalities. The second equality is due to  $\nabla f(x^*) = 0$ . The second inequality is due to the  $L$ -g-smoothness assumption. The third inequality is due to triangle inequality.

Notice that  $\mathbb{E}v_t^{s+1} = \nabla f(x_t^{s+1})$  and  $x_{t+1}^{s+1} = \text{Exp}_{x_t^{s+1}}(-\eta v_t^{s+1})$ , we thus have

$$\begin{aligned} \mathbb{E}d^2(x_{t+1}^{s+1}, x^*) &\leq d^2(x_t^{s+1}, x^*) + 2\eta\langle \text{Exp}_{x_t^{s+1}}^{-1}(x^*), \mathbb{E}v_t \rangle + \zeta\eta^2\mathbb{E}\|v_t\|^2 \\ &\leq d^2(x_t^{s+1}, x^*) + 2\eta\langle \text{Exp}_{x_t^{s+1}}^{-1}(x^*), \nabla f(x_t^{s+1}) \rangle \\ &\quad + \zeta\eta^2 L^2 (4d^2(x_t^{s+1}, x^*) + 6d^2(\tilde{x}^s, x^*)) \\ &\leq (1 + 4\zeta\eta^2 L^2 - \eta\mu) d^2(x_t^{s+1}, x^*) + 6\zeta\eta^2 L^2 d^2(\tilde{x}^s, x^*) \\ &\quad + 2\eta(f(x^*) - f(x_t^{s+1})) \\ &\leq (1 + 4\zeta\eta^2 L^2 - 2\eta\mu) d^2(x_t^{s+1}, x^*) + 6\zeta\eta^2 L^2 d^2(\tilde{x}^s, x^*) \end{aligned}$$

The first inequality uses the trigonometric distance lemma, the second one uses previously obtained bound for  $\mathbb{E}\|v_t\|^2$ , the third and fourth use the  $\mu$ -strong g-convexity of  $f(x)$ .

We now denote  $u_t \triangleq \mathbb{E}d^2(x_t^{s+1}, x^*)$ ,  $q \triangleq 1 + 4\zeta\eta^2 L^2 - 2\eta\mu$ ,  $p \triangleq 6\zeta\eta^2 L^2 / (1 - q)$ . Hence by taking expectation with all the history, and noting  $\tilde{x}^s = x_0^{s+1}$ , we have  $u_{t+1} \leq qu_t + p(1 - q)u_0$ , i.e.  $u_{t+1} - pu_0 \leq q(u_t - pu_0)$ . Therefore,  $u_m - pu_0 \leq q^m(u_0 - pu_0)$ , hence we get

$$u_m \leq (p + q^m(1 - p))u_0,$$

where  $p + q^m(1 - p) = \frac{3\zeta\eta L^2}{\mu - 2\zeta\eta L^2} + \frac{(1 + 4\zeta\eta^2 L^2 - 2\eta\mu)^m(\mu - 5\zeta\eta L^2)}{\mu - 2\zeta\eta L^2} = \alpha$ . It follows directly from the algorithm that after  $S$  outer loops,  $\mathbb{E}d^2(x_a, x^*) = \mathbb{E}d^2(\tilde{x}^S, x^*) \leq \alpha^S d^2(x^0, x^*)$ .  $\square$

**Corollary 1.** With assumptions as in Theorem 1 and properly chosen parameters, after  $O\left((n + \frac{\zeta L^2}{\mu^2}) \log(\frac{1}{\epsilon})\right)$  IFO calls, the output  $x_a$  satisfies

$$\mathbb{E}[f(x_a) - f(x^*)] \leq \epsilon.$$

*Proof.* Assume we choose  $\eta = \mu/(17\zeta L^2)$  and  $m \geq 10\zeta L^2/\mu^2$ , it follows that  $q = 1 - 30\mu^2/(289\zeta L^2) \leq 1 - \mu^2/(10\zeta L^2)$ ,  $p = 1/5$  and therefore

$$u_m \leq \left(\frac{1}{5} + \frac{4}{5} (1 - \mu^2/(10\zeta L^2))^{10\zeta L^2/\mu^2}\right) u_0 \leq \left(\frac{1}{5} + \frac{4}{5e}\right) u_0 \leq \frac{u_0}{2},$$

where the second inequality is due to  $(1 - x)^{1/x} \leq 1/e$  for  $x \in (0, 1)$ . Applying Theorem 1 with  $\alpha = 1/2$ , we have  $\mathbb{E}d^2(x_a, x^*) \leq 2^{-S}d^2(x^0, x^*)$ . Note that by using the  $L$ -g-smooth assumption, we also get  $\mathbb{E}[f(x_a) - f(x^*)] \leq \mathbb{E}[\frac{1}{2}Ld^2(x_a, x^*)] \leq 2^{-S-1}Ld^2(x^0, x^*)$ . It thus suffices to run  $\log_2(Ld^2(x^0, x^*)/\epsilon) - 1$  outer loops to guarantee  $\mathbb{E}[f(x_a) - f(x^*)] \leq \epsilon$ .

For the  $s$ -th outer loop, we need  $n$  IFO calls to evaluate the full gradient at  $\tilde{x}^s$ , and  $2m$  IFO calls when calculating each variance reduced gradient. Hence the total number of IFO calls to reach  $\epsilon$  accuracy is  $O\left((n + \frac{\zeta L^2}{\mu^2}) \log(\frac{1}{\epsilon})\right)$ .  $\square$

## B Proofs for Section 3.2

**Theorem 5.** Assuming the inverse exponential map is well-defined on  $\mathcal{X}$ ,  $f : \mathcal{X} \rightarrow \mathbb{R}$  is a geodesically  $L$ -smooth function, stochastic first-order oracle  $\nabla \tilde{f}(x)$  satisfies  $\mathbb{E}[\nabla \tilde{f}(x^t)] = \nabla f(x^t)$ ,  $\|\nabla \tilde{f}(x^t)\|^2 \leq \sigma^2$ , then the SGD algorithm  $x^{t+1} = \text{Exp}_{x^t}(-\eta \nabla \tilde{f}(x^t))$  with  $\eta = c/\sqrt{T}$ ,  $c = \sqrt{\frac{2(f(x^0) - f(x^*))}{L\sigma^2}}$  satisfies

$$\min_{0 \leq t \leq T-1} \mathbb{E}[\|\nabla f(x^t)\|^2] \leq \sqrt{\frac{2(f(x^0) - f(x^*))L}{T}} \sigma.$$

*Proof.*

$$\begin{aligned} \mathbb{E}[f(x^{t+1})] &\leq \mathbb{E}[f(x^t) + \langle \nabla f(x^t), \text{Exp}_{x^t}^{-1}(x^{t+1}) \rangle] + \frac{L}{2} \|\text{Exp}_{x^t}^{-1}(x^{t+1})\|^2 \\ &\leq \mathbb{E}[f(x^t)] - \eta \mathbb{E}[\|\nabla f(x^t)\|^2] + \frac{L\eta^2}{2} \mathbb{E}[\|\nabla \tilde{f}(x^t)\|^2] \\ &\leq \mathbb{E}[f(x^t)] - \eta \mathbb{E}[\|\nabla f(x^t)\|^2] + \frac{L\eta^2}{2} \sigma^2 \end{aligned}$$

After rearrangement, we obtain

$$\mathbb{E}[\|\nabla f(x^t)\|^2] \leq \frac{1}{\eta} \mathbb{E}[f(x^t) - f(x^{t+1})] + \frac{L\eta}{2} \sigma^2$$

Summing up the above equation from  $t = 0$  to  $T - 1$  and using  $\eta = c/\sqrt{T}$  where

$$c = \sqrt{\frac{2(f(x^0) - f(x^*))}{L\sigma^2}}$$

we obtain

$$\begin{aligned} \min_t \mathbb{E}[\|\nabla f(x^t)\|^2] &\leq \frac{1}{T} \sum_{t=0}^{T-1} \mathbb{E}[\|f(x^t)\|^2] \leq \frac{1}{T\eta} \mathbb{E}[f(x^0) - f(x^T)] + \frac{L\eta}{2} \sigma^2 \\ &\leq \frac{1}{T\eta} (f(x^0) - f(x^*)) + \frac{L\eta}{2} \sigma^2 \\ &\leq \sqrt{\frac{2(f(x^0) - f(x^*))L}{T}} \sigma \end{aligned}$$

$\square$

**Lemma 2.** Assume in (1) each  $f_i$  is  $L$ -g-smooth, the sectional curvature in  $\mathcal{X}$  is lower bounded by  $\kappa_{\min}$ , and we run Algorithm 1 with Option II. For  $c_t, c_{t+1}, \beta, \eta > 0$ , suppose we have

$$c_t = c_{t+1} (1 + \beta\eta + 2\zeta L^2 \eta^2) + L^3 \eta^2$$

and

$$\delta(t) = \eta - \frac{c_{t+1}\eta}{\beta} - L\eta^2 - 2c_{t+1}\zeta\eta^2 > 0,$$

then the iterate  $x_t^{s+1}$  satisfies the bound:

$$\mathbb{E} [\|\nabla f(x_t^{s+1})\|^2] \leq \frac{R_t^{s+1} - R_{t+1}^{s+1}}{\delta_t}$$

where  $R_t^{s+1} := \mathbb{E}[f(x_t^{s+1}) + c_t \|\text{Exp}_{\tilde{x}^s}(x_t^{s+1})\|^2]$  for  $0 \leq s \leq S-1$ .

*Proof.* Since  $f$  is  $L$ -smooth we have

$$\begin{aligned} \mathbb{E}[f(x_{t+1}^{s+1})] &\leq \mathbb{E}[f(x_t^{s+1}) + \langle \nabla f(x_t^{s+1}), \text{Exp}_{x_t^{s+1}}^{-1}(x_{t+1}^{s+1}) \rangle] + \frac{L}{2} \|\text{Exp}_{x_t^{s+1}}^{-1}(x_{t+1}^{s+1})\|^2 \\ &\leq \mathbb{E}[f(x_t^{s+1}) - \eta \|\nabla f(x_t^{s+1})\|^2 + \frac{L\eta^2}{2} \|v_t^{s+1}\|^2] \end{aligned} \quad (6)$$

Consider now the Lyapunov function

$$R_t^{s+1} := \mathbb{E}[f(x_t^{s+1}) + c_t \|\text{Exp}_{\tilde{x}^s}(x_t^{s+1})\|^2]$$

For bounding it we will require the following:

$$\begin{aligned} \mathbb{E}[\|\text{Exp}_{\tilde{x}^s}^{-1}(x_{t+1}^{s+1})\|^2] &\leq \mathbb{E}[\|\text{Exp}_{\tilde{x}^s}^{-1}(x_t^{s+1})\|^2 + \zeta \|\text{Exp}_{x_t^{s+1}}^{-1}(x_{t+1}^{s+1})\|^2 \\ &\quad - 2\langle \text{Exp}_{x_t^{s+1}}^{-1}(x_{t+1}^{s+1}), \text{Exp}_{x_t^{s+1}}^{-1}(\tilde{x}^s) \rangle] \\ &= \mathbb{E}[\|\text{Exp}_{\tilde{x}^s}^{-1}(x_t^{s+1})\|^2 + \zeta \eta^2 \|v_t^{s+1}\|^2 \\ &\quad + 2\eta \langle \nabla f(x_t^{s+1}), \text{Exp}_{x_t^{s+1}}^{-1}(\tilde{x}^s) \rangle] \\ &\leq \mathbb{E}[\|\text{Exp}_{\tilde{x}^s}^{-1}(x_t^{s+1})\|^2 + \zeta \eta^2 \|v_t^{s+1}\|^2] \\ &\quad + 2\eta \mathbb{E} \left[ \frac{1}{2\beta} \|\nabla f(x_t^{s+1})\|^2 + \frac{\beta}{2} \|\text{Exp}_{\tilde{x}^s}^{-1}(x_t^{s+1})\|^2 \right] \end{aligned} \quad (7)$$

where the first inequality is due to Lemma 1, the second due to  $2\langle a, b \rangle \leq \frac{1}{\beta} \|a\|^2 + \beta \|b\|^2$ . Plugging Equation (6) and Equation (7) into  $R_{t+1}^{s+1}$ , we obtain the following bound:

$$\begin{aligned} R_{t+1}^{s+1} &\leq \mathbb{E}[f(x_t^{s+1}) - \eta \|\nabla f(x_t^{s+1})\|^2 + \frac{L\eta^2}{2} \|v_t^{s+1}\|^2] \\ &\quad + c_{t+1} \mathbb{E}[\|\text{Exp}_{\tilde{x}^s}^{-1}(x_t^{s+1})\|^2 + \zeta \eta^2 \|v_t^{s+1}\|^2] \\ &\quad + 2c_{t+1} \eta \mathbb{E} \left[ \frac{1}{2\beta} \|\nabla f(x_t^{s+1})\|^2 + \frac{\beta}{2} \|\text{Exp}_{\tilde{x}^s}^{-1}(x_t^{s+1})\|^2 \right] \\ &= \mathbb{E} \left[ f(x_t^{s+1}) - \left( \eta - \frac{c_{t+1}\eta}{\beta} \right) \|\nabla f(x_t^{s+1})\|^2 \right] \\ &\quad + \left( \frac{L\eta^2}{2} + c_{t+1}\zeta\eta^2 \right) \mathbb{E} [\|v_t^{s+1}\|^2] \\ &\quad + (c_{t+1} + c_{t+1}\eta\beta) \mathbb{E} [\|\text{Exp}_{\tilde{x}^s}^{-1}(x_t^{s+1})\|^2] \end{aligned} \quad (8)$$

It remains to bound  $\mathbb{E} [\|v_t^{s+1}\|^2]$ . Denoting  $\Delta_t^{s+1} = \nabla f_{i_t}(x_t^{s+1}) - \Gamma_{\tilde{x}^s}^{x_t^{s+1}} \nabla f_{i_t}(\tilde{x}^s)$ , we have  $\mathbb{E}[\Delta_t^{s+1}] = \nabla f(x_t^{s+1}) - \Gamma_{\tilde{x}^s}^{x_t^{s+1}} \nabla f(\tilde{x}^s)$ , and thus

$$\begin{aligned} \mathbb{E} [\|v_t^{s+1}\|^2] &= \mathbb{E} [\|\Delta_t^{s+1} + \Gamma_{\tilde{x}^s}^{x_t^{s+1}} \nabla f(\tilde{x}^s)\|^2] \\ &= \mathbb{E} [\|\Delta_t^{s+1} - \mathbb{E}[\Delta_t^{s+1}] + \nabla f(x_t^{s+1})\|^2] \\ &\leq 2\mathbb{E}[\|\Delta_t^{s+1} - \mathbb{E}[\Delta_t^{s+1}]\|^2] + 2\mathbb{E}[\|\nabla f(x_t^{s+1})\|^2] \\ &\leq 2\mathbb{E}[\|\Delta_t^{s+1}\|^2] + 2\mathbb{E}[\|\nabla f(x_t^{s+1})\|^2] \\ &\leq 2L^2 \mathbb{E}[\|\text{Exp}_{\tilde{x}^s}^{-1}(x_t^{s+1})\|^2] + 2\mathbb{E}[\|\nabla f(x_t^{s+1})\|^2] \end{aligned} \quad (9)$$

where the first inequality is due to  $\|a + b\|^2 \leq 2\|a\|^2 + 2\|b\|^2$ , the second due to  $\mathbb{E}\|\xi - \mathbb{E}\xi\|^2 = \mathbb{E}\|\xi\|^2 - \|\mathbb{E}\xi\|^2 \leq \mathbb{E}\|\xi\|^2$  for any random vector  $\xi$  in any tangent space, the third due to  $L$ -g-smooth assumption. Substituting Equation (9) into Equation (8) we get

$$\begin{aligned} R_{t+1}^{s+1} &\leq \mathbb{E} \left[ f(x_t^{s+1}) - \left( \eta - \frac{c_{t+1}\eta}{\beta} - L\eta^2 - 2c_{t+1}\zeta\eta^2 \right) \|\nabla f(x_t^{s+1})\|^2 \right] \\ &\quad + (c_{t+1} (1 + \beta\eta + 2\zeta L^2\eta^2) + L^3\eta^2) \mathbb{E} [\|\text{Exp}_{\tilde{x}^s}^{-1}(x_t^{s+1})\|^2] \\ &= R_t^{s+1} - \left( \eta - \frac{c_{t+1}\eta}{\beta} - L\eta^2 - 2c_{t+1}\zeta\eta^2 \right) \mathbb{E} [\|\nabla f(x_t^{s+1})\|^2] \end{aligned} \quad (10)$$

Rearranging terms completes the proof.  $\square$

**Theorem 6.** With assumptions as in Lemma 2, let  $c_m = 0, \eta > 0, \beta > 0$ , and  $c_t = c_{t+1} (1 + \beta\eta + 2\zeta L^2\eta^2) + L^3\eta^2$  such that  $\delta(t) > 0$  for  $0 \leq t \leq m-1$ . Define the quantity  $\delta_n := \min_t \delta(t)$ , and let  $T = mS$ . Then for the output  $x_a$  from Option II we have

$$\mathbb{E}[\|\nabla f(x_a)\|^2] \leq \frac{f(x^0) - f(x^*)}{T\delta_n}$$

*Proof.* Using Lemma 2 and telescoping the sum, we obtain

$$\sum_{t=0}^{m-1} \mathbb{E}[\|\nabla f(x_t^{s+1})\|^2] \leq \frac{R_0^{s+1} - R_m^{s+1}}{\delta_n}$$

Since  $c_m = 0$  and  $x_0^{s+1} = \tilde{x}^s$ , we thus have

$$\sum_{t=0}^{m-1} \mathbb{E}[\|\nabla f(x_t^{s+1})\|^2] \leq \frac{\mathbb{E}[f(\tilde{x}^s) - f(\tilde{x}^{s+1})]}{\delta_n}, \quad (11)$$

Now sum over all epochs to obtain

$$\frac{1}{T} \sum_{s=0}^{S-1} \sum_{t=0}^{m-1} \mathbb{E}[\|\nabla f(x_t^{s+1})\|^2] \leq \frac{f(\tilde{x}^0) - f(x^*)}{T\delta_n} \quad (12)$$

Note the definition of  $x_a$  implies that the left hand side of (12) is exactly  $\mathbb{E}[\|\nabla f(x_a)\|^2]$ .  $\square$

**Theorem 2.** Assume in (1) each  $f_i$  is  $L$ -g-smooth, the sectional curvature in  $\mathcal{X}$  is lower bounded by  $\kappa_{\min}$ , and we run Algorithm 1 with Option II. Then there exist universal constants  $\mu_0 \in (0, 1), \nu > 0$  such that if we set  $\eta = \mu_0/(Ln^{\alpha_1}\zeta^{\alpha_2})$  ( $0 < \alpha_1 \leq 1$  and  $0 \leq \alpha_2 \leq 2$ ),  $m = \lfloor n^{3\alpha_1/2}/(3\mu_0\zeta^{1-2\alpha_2}) \rfloor$  and  $T = mS$ , we have

$$\mathbb{E}[\|\nabla f(x_a)\|^2] \leq \frac{Ln^{\alpha_1}\zeta^{\alpha_2}[f(x^0) - f(x^*)]}{T\nu},$$

where  $x^*$  is an optimal solution to the problem in (1).

*Proof.* Let  $\beta = L\zeta^{1-\alpha_2}/n^{\alpha_1/2}$ . From the recurrence relation  $c_t = c_{t+1} (1 + \beta\eta + 2\zeta L^2\eta^2) + L^3\eta^2$  and  $c_m = 0$  we have

$$c_0 = \frac{\mu_0^2 L}{n^{2\alpha_1}\zeta^{2\alpha_2}} \frac{(1 + \theta)^m - 1}{\theta},$$

where

$$\theta = \eta\beta + 2\zeta\eta^2 L^2 = \frac{\mu_0\zeta^{1-2\alpha_2}}{n^{3\alpha_1/2}} + \frac{2\mu_0^2\zeta^{1-2\alpha_2}}{n^{2\alpha_1}} \in \left( \frac{\mu_0\zeta^{1-2\alpha_2}}{n^{3\alpha_1/2}}, \frac{3\mu_0\zeta^{1-2\alpha_2}}{n^{3\alpha_1/2}} \right).$$

Notice that  $\theta < 1/m$  so that  $(1 + \theta)^m < e$ . We can thus bound  $c_0$  by

$$c_0 \leq \frac{\mu_0 L}{n^{\alpha_1/2}\zeta} (e - 1)$$

and in turn bound  $\delta_n$  by

$$\begin{aligned}
\delta_n &= \min_t \left( \eta - \frac{c_{t+1}\eta}{\beta} - \eta^2 L - 2c_{t+1}\zeta\eta^2 \right) \\
&\geq \left( \eta - \frac{c_0\eta}{\beta} - \eta^2 L - 2c_0\zeta\eta^2 \right) \\
&\geq \eta \left( 1 - \frac{\mu_0(e-1)}{\zeta^{2-\alpha_2}} - \frac{\mu_0}{n^{\alpha_1}\zeta^{\alpha_2}} - \frac{2\mu_0^2(e-1)}{n^{3\alpha_1/2}\zeta^{\alpha_2}} \right) \\
&\geq \frac{\nu}{Ln^{\alpha_1}\zeta^{\alpha_2}}
\end{aligned}$$

where the last inequality holds for small enough  $\mu_0$ , as  $\zeta, n \geq 1$ . For example, it holds for  $\mu_0 = 1/10, \nu = 1/20$ . Substituting the above bound in Theorem 6 concludes the proof.  $\square$

**Corollary 2.** With assumptions and parameters in Theorem 2, choosing  $\alpha_1 = 2/3$ , the IFO complexity for achieving an  $\epsilon$ -accurate solution is:

$$\text{IFO calls} = \begin{cases} O(n + (n^{2/3}\zeta^{1-\alpha_2}/\epsilon)), & \text{if } \alpha_2 \leq 1/2, \\ O(n\zeta^{2\alpha_2-1} + (n^{2/3}\zeta^{\alpha_2}/\epsilon)), & \text{if } \alpha_2 > 1/2. \end{cases}$$

*Proof.* Note that to reach an  $\epsilon$ -accurate solution,  $O(n^{\alpha_1}\zeta^{\alpha_2}/(m\epsilon)) = O(1 + n^{-1/3}\zeta^{1-\alpha_2}/\epsilon)$  epochs are required. On the other hand, one epoch takes  $O(n(1 + \zeta^{2\alpha_2-1}))$  IFO calls. Thus the total amount of IFO calls is  $O(n(1 + \zeta^{2\alpha_2-1})(1 + n^{-1/3}\zeta^{1-\alpha_2}/\epsilon))$ . Simplify to get the stated result.  $\square$

**Theorem 3.** Suppose that in addition to the assumptions in Theorem 2,  $f$  is  $\tau$ -gradient dominated. Then there exist universal constants  $\mu_0 \in (0, 1), \nu > 0$  such that if we run Algorithm 2 with  $\eta = \mu_0/(Ln^{2/3}\zeta^{1/2}), m = \lfloor n/(3\mu_0) \rfloor, S = \lceil (6 + \frac{18\mu_0}{n-3})L\tau\zeta^{1/2}\mu_0/(\nu n^{1/3}) \rceil$ , we have

$$\begin{aligned}
\mathbb{E}[\|\nabla f(x^K)\|^2] &\leq 2^{-K} \|\nabla f(x^0)\|^2, \\
\mathbb{E}[f(x^K) - f(x^*)] &\leq 2^{-K} [f(x^0) - f(x^*)].
\end{aligned}$$

*Proof.* Apply Theorem 2. Observe that for each run of Algorithm 1 with Option II we now have  $T = mS \geq 2L\tau n^{2/3}\zeta^{1/2}/\nu$ , which implies

$$\frac{1}{\tau} \mathbb{E}[f(x^{k+1}) - f(x^*)] \leq \mathbb{E}[\|\nabla f(x^{k+1})\|^2] \leq \frac{1}{2\tau} \mathbb{E}[f(x^k) - f(x^*)] \leq \frac{1}{2} \mathbb{E}[\|\nabla f(x^k)\|^2]$$

The theorem follows by recursive application of the above inequality.  $\square$

**Corollary 4.** With Algorithm 2 and the parameters in Theorem 3, the IFO complexity to compute an  $\epsilon$ -accurate solution for gradient dominated function  $f$  is  $O((n + L\tau\zeta^{1/2}n^{2/3})\log(1/\epsilon))$ .

*Proof.* We need  $O((n + m)S) = O(n + L\tau\zeta^{1/2}n^{2/3})$  IFO calls in a run of Algorithm 1 to double the accuracy, thus in Algorithm 2,  $K = O(\log(1/\epsilon))$  runs are needed to reach  $\epsilon$ -accuracy.  $\square$

**Corollary 5.** With Algorithm 2 and the parameters in Theorem 3, the IFO complexity to compute an  $\epsilon$ -accurate solution for a  $\mu$ -strongly g-convex function  $f$  is  $O((n + \mu^{-1}L\zeta^{1/2}n^{2/3})\log(1/\epsilon))$ .

*Proof.* Assume  $x^*$  is the minimizer of  $f$  and  $f$  is  $\mu$ -strongly g-convex, then we have

$$\begin{aligned}
f(x^*) &= \min_y f(y) \\
&\geq \min_y f(x) + \langle \nabla f(x), \text{Exp}_x^{-1}(y) \rangle + \frac{\mu}{2} \|\text{Exp}_x^{-1}(y)\|^2 \\
&= f(x) - \frac{1}{2\mu} \|\nabla f(x)\|^2 + \min_y \frac{1}{2\mu} \|\nabla f(x) + \mu \text{Exp}_x^{-1}(y)\|^2 \\
&\geq f(x) - \frac{1}{2\mu} \|\nabla f(x)\|^2
\end{aligned}$$

where we get the first inequality by strong g-convexity, the second equality by completing the squares, and the second inequality by choosing  $y = \text{Exp}_x\left(-\frac{1}{\mu}\nabla f(x)\right)$ . Thus  $f(x)$  is  $(1/(2\mu))$ -gradient dominated, and choosing  $\tau = 1/(2\mu)$  in Corollary 4 concludes the proof.  $\square$

## C Proof for Section 4.1

**Theorem 4.** Suppose  $A$  has eigenvalues  $\lambda_1 > \lambda_2 \geq \dots \geq \lambda_d$  and  $\delta = \lambda_1 - \lambda_2$ , and  $x^0$  is drawn uniformly randomly on the hypersphere. Then with probability  $1 - p$ ,  $x^0$  falls in a Riemannian ball of a global optimum of the objective function, within which the objective function is  $O(\frac{d}{p^2\delta})$ -gradient dominated.

*Proof.* We write  $x$  in the basis of  $A$ 's eigenvectors  $\{v_i\}_{i=1}^d$  with corresponding eigenvalues  $\lambda_1 > \lambda_2 \geq \dots \geq \lambda_d$ , i.e.  $x = \sum_{i=1}^d \alpha_i v_i$ . Thus  $Ax = \sum_{i=1}^d \alpha_i \lambda_i v_i$  and  $f(x) = -\sum_{i=1}^d \alpha_i^2 \lambda_i$ . The Riemannian gradient of  $f(x)$  is  $P_x \nabla f(x) = -2(I - xx^\top)Ax = -2(Ax + f(x)x) = -2\sum_{i=1}^d \alpha_i(\lambda_i - \sum_{j=1}^d \alpha_j^2 \lambda_j)v_i$  (see [1, Example 3.6.1]). Now consider a Riemannian ball on the hypersphere defined by  $\mathcal{B}_\epsilon \triangleq \{x : x \in \mathbb{S}^{d-1}, \alpha_1 \geq \epsilon\}$ , note that the center of  $\mathcal{B}_\epsilon$  is the first eigenvector. We apply a case by case argument with respect to  $f(x) - f(x^*)$ . If  $f(x) - f(x^*) \geq \frac{\delta}{2}$ , we can lower bound the gradient by

$$\begin{aligned} \frac{1}{4} \|P_x \nabla f(x)\|^2 &= \sum_{i=1}^d \alpha_i^2 \left( \lambda_i - \sum_{j=1}^d \alpha_j^2 \lambda_j \right)^2 \geq \alpha_1^2 \left( \lambda_1 - \sum_{j=1}^d \alpha_j^2 \lambda_j \right)^2 = \alpha_1^2 (f(x) - f(x^*))^2 \\ &\geq \frac{1}{2} \alpha_1^2 \delta (f(x) - f(x^*)) \geq \frac{1}{2} \epsilon^2 \delta (f(x) - f(x^*)) \end{aligned}$$

The last equality follows from the fact that  $f(x^*) = -\lambda_1$  and  $f(x) = -\sum_{i=1}^d \alpha_i^2 \lambda_i$ . On the other hand, if  $f(x) - f(x^*) < \frac{\delta}{2}$ , for  $i = 2, \dots, d$ , since  $-\lambda_i - f(x^*) \geq \delta$ , we have  $-\lambda_i - f(x) > \frac{1}{2}(-\lambda_i - f(x^*)) \geq \delta/2$ . We can, again, lower bound the gradient by

$$\begin{aligned} \|P_x \nabla f(x)\|^2 &= 4 \sum_{i=1}^d \alpha_i^2 \left( \lambda_i - \sum_{j=1}^d \alpha_j^2 \lambda_j \right)^2 \geq 4 \sum_{i=2}^d \alpha_i^2 \left( \lambda_i - \sum_{j=1}^d \alpha_j^2 \lambda_j \right)^2 \\ &\geq \sum_{i=2}^d \alpha_i^2 (\lambda_1 - \lambda_i)^2 \geq \delta \sum_{i=2}^d \alpha_i^2 (\lambda_1 - \lambda_i) = \delta (f(x) - f(x^*)) \end{aligned}$$

Combining the two cases, we have that within  $\mathcal{B}_\epsilon$  the objective function (5) is  $\max\{\frac{1}{2\epsilon^2\delta}, \frac{1}{\delta}\}$ -gradient dominated. Finally, observe that if  $x^0$  is chosen uniformly at random on  $\mathbb{S}^{d-1}$ , then with probability at least  $1 - p$ ,  $\alpha_1^2 = \Omega(\frac{p^2}{d})$ , i.e. there exists some constant  $c > 0$  such that  $\frac{1}{\epsilon^2} \leq \frac{cd}{p^2}$ .  $\square$
